# Supplementary material
Source: MDPI journal article supplement (https://www.mdpi.com/2079-6412/12/5/689)
Supplement: s1 [file s1]

# Supplementary Materials: Overcoming the Dilemma between Low Electrical Resistance and High Corrosion Resistance Using a Ta/(Ta,Ti)N/TiN/Ti Multilayer for Proton Exchange Membrane Fuel Cells

Rong Tu <sup>1,2,3</sup>, Rui Min <sup>1</sup>, Mai Yang <sup>1</sup>, Yang Yuan <sup>1</sup>, Long Zheng <sup>4</sup>, Qizhong Li <sup>1,5,\*</sup>, Baifeng Ji <sup>6</sup>, Song Zhang <sup>1</sup>, Meijun Yang <sup>1</sup> and Ji Shi <sup>7</sup>

<sup>1</sup> State Key Laboratory of Advanced Technology for Materials Synthesis and Processing, Wuhan University of Technology, Wuhan 430070, China; turong@whut.edu.cn (R.T.); 290889@whut.edu.cn (R.M.); yangmai@whut.edu.cn (M.Y.); yuan\_yang@whut.edu.cn (Y.Y.); kobe@whut.edu.cn (S.Z.); liyangmeijun@163.com (M.Y.)

<sup>2</sup> Chaozhou Branch of Chemistry and Chemical Engineering Guangdong Laboratory, Chaozhou 521000, China

<sup>3</sup> Wuhan University of Technology Advanced Engineering Technology Research Institute of Zhongshan City, Zhongshan 528400, China

<sup>4</sup> Zhongshan Vapor Technology Co., Ltd., Zhongshan 528400, China; zhenglong1227@163.com

<sup>5</sup> Hubei Key Laboratory of Advanced Technology for Automotive Components, Wuhan University of Technology, Wuhan 430070, China

<sup>6</sup> Hubei Key Laboratory of Roadway Bridge and Structure Engineering, Wuhan University of Technology, Wuhan 430070, China; jbfeng@whut.edu.cn

<sup>7</sup> School of Materials and Chemical Technology, Tokyo Institute of Technology, Tokyo 152-8552, Japan; shi.j.aa@m.titech.ac.jp

\* Correspondence: author: qizhongli@whut.edu.cn

**Table S1.** Deposition parameters of Ta/(Ta,Ti)N/TiN/Ti multilayer coatings.

| Layer | Pressure (Pa) | Temperature (°C) | Power (W) |    | Flow rate (sccm) |                |
|-------|---------------|------------------|-----------|----|------------------|----------------|
|       |               |                  | Ta        | Ti | Ar               | N <sub>2</sub> |
| TaN   | 2             | 350              | 50        | 0  | 5                | 10             |
| TaTiN | 2             | 350              | 50        | 50 | 5                | 10             |
| TiN   | 0.5           | 350              | 0         | 50 | 5                | 10             |
| Ti    | 0.5           | 350              | 0         | 50 | 12               | 0              |

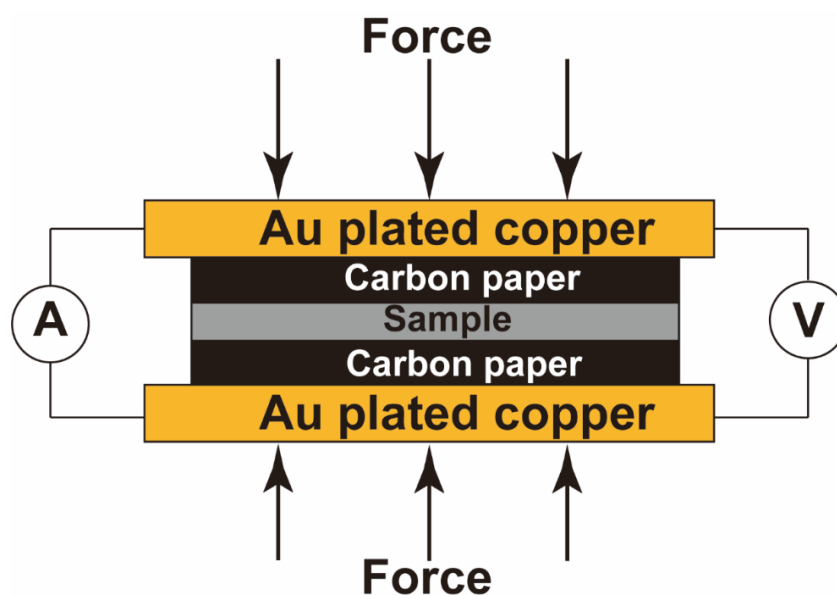

**Figure S1.** Schematic diagram of interface contact resistance measuring fixture.

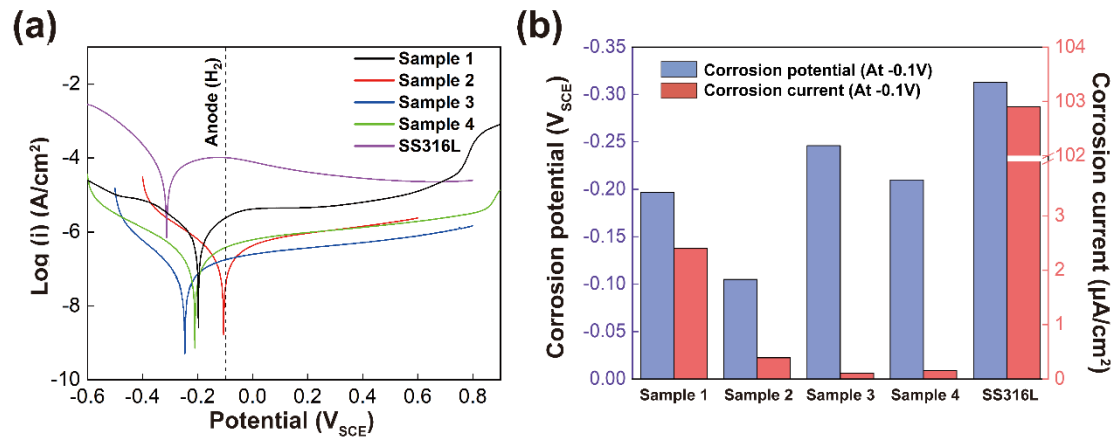

**Figure S2.** Electrochemical performance of thin films (a) Potentiodynamic polarization curves of uncoated SS316L and coated samples in 0.5 M H<sub>2</sub>SO<sub>4</sub> solution at 70 °C (anode). (b) Self-corrosion potential and corrosion current at -0.1 V measured by potentiodynamic polarization curves.

**Table S2.** Tantalum series protective coating test data reported in literature.

| Substrate | Surface modification | Electrolyte                                                                            | Corrosion current density (μA/cm <sup>2</sup> ) | ICR (mΩ cm <sup>2</sup> ) | Ref.      |
|-----------|----------------------|----------------------------------------------------------------------------------------|-------------------------------------------------|---------------------------|-----------|
| 316       | TaN/(Ta,Ti)N/TiN/Ti  | 0.5 M H <sub>2</sub> SO <sub>4</sub> + 2 ppm HF at 70 °C                               | 0.28 at 0.6 V vs. SCE                           | 6                         | This work |
| 316       | TaN                  | 0.5 M H <sub>2</sub> SO <sub>4</sub> + 0.02 M HF at 80 °C                              | 0.33 at 0.6 V vs. SCE                           | 11                        | [1]       |
| 430       | PL-Ta/TaN            | 85 % H <sub>3</sub> PO <sub>4</sub> solution at 80 °C                                  | 0.79 at 0.6 V vs. SCE                           | 9                         | [2]       |
| 316       | TaN                  | H <sub>2</sub> SO <sub>4</sub> pH = 3 at 80 °C                                         | 1 at 0.6 V vs. SCE                              | 7                         | [3]       |
| 430       | Ta                   | 0.5 M H <sub>2</sub> SO <sub>4</sub> + 5 M ethanol + 1 M acetic acid solution at 60 °C | 1.01 at 0.6 V vs. SCE                           | 30                        | [4]       |
| 316       | Ta                   | 0.5 M H <sub>2</sub> SO <sub>4</sub> at 70 °C                                          | 9.25 at 0.6 V vs. SCE                           | Not Available             | [5]       |
| 316       | Ta                   | H <sub>2</sub> SO <sub>4</sub> + 0.1 ppm HF pH = 3                                     | 0.05                                            | 22                        | [6]       |
| 316       | PL-Ta/TaN            | 0.5 M H <sub>2</sub> SO <sub>4</sub> + 2 ppm HF 80 °C                                  | 0.05                                            | 12                        | [7]       |
| Mg        | Ta/Ag                | 0.5 M H <sub>2</sub> SO <sub>4</sub> + 0.1 ppm HF electrolyte at 80 °C                 | 0.007                                           | 28                        | [8]       |

**Table S3.** Comparison of graphite bipolar plate and SS316L.

| -           | Electrical conductivity (S/cm) | Yield strength (MPa) | Flexural strength (MPa) | corrosion resistance (μA/cm <sup>2</sup> ) | Density (g/cm <sup>3</sup> ) | ICR (mΩ cm <sup>2</sup> ) | Cost (\$/kg)  | Ref.      |
|-------------|--------------------------------|----------------------|-------------------------|--------------------------------------------|------------------------------|---------------------------|---------------|-----------|
| SS316L      | 133                            | 177                  | Not Available           | 1178                                       | 7.98                         | about 300                 | 1.2           | This work |
| Graphite BP | 127                            | Not Available        | 54                      | 0.42                                       | 1.5                          | 8                         | 18            | [9,10]    |
| DOE target  | >100                           | Not Available        | >25                     | <1                                         | Not Available                | <10                       | Not Available | [11]      |

## References

- Choe, C.; Choi, H.; Hong, W.; Lee, J.J. Tantalum Nitride Coated AISI 316L as Bipolar Plate for Polymer Electrolyte Membrane Fuel Cell. *Int. J. Hydrogen Energy* **2012**, *37*, 405–411, doi:10.1016/j.ijhydene.2011.09.060.
- Wang, L.; Li, L.; Liu, H.; Wang, S.; Fang, H.; Gao, H.; Gao, K.; Zhang, Y.; Sun, J.; Yan, J. Polylamine TaN/Ta Coating Modified Ferritic Stainless Steel Bipolar Plate for High Temperature Proton Exchange Membrane Fuel Cell. *J. Power Sources* **2018**, *399*, 343–349, doi:10.1016/j.jpowsour.2018.07.122.

3. Mendizabal, L.; Oedegaard, A.; Kongstein, O.E.; Lædre, S.; Walmsley, J.; Barriga, J.; Gonzalez, J.J. TaNX Coatings Deposited by HPPMS on SS316L Bipolar Plates for Polymer Electrolyte Membrane Fuel Cells: Correlation between Corrosion Current, Contact Resistance and Barrier Oxide Film Formation. *Int. J. Hydrog. Energy* **2017**, *42*, 3259–3270, doi:10.1016/j.ijhydene.2017.01.070.
4. Wang, L.; Li, L.; Shen, J.; Gao, H.; Sun, J.; Wang, H.; Cao, Y. High Conductivity and Anti-Corrosive Tantalum Surface Modified Ferritic Stainless Steel Bipolar Plate for Direct Ethanol Fuel Cell. *Results Phys.* **2019**, *14*, 102394 doi:10.1016/j.rinp.2019.102394.
5. Wu, B.; Fu, Y.; Xu, J.; Lin, G.; Hou, M. Chromium Nitride Films on Stainless Steel as Bipolar Plate for Proton Exchange Membrane Fuel Cell. *J. Power Sources* **2009**, *194*, 976–980, doi:10.1016/j.jpowsour.2009.06.029.
6. Manso, A.P.; Marzo, F.F.; Garicano, X.; Alegre, C.; Lozano, A.; Barreras, F. Corrosion Behavior of Tantalum Coatings on AISI 316L Stainless Steel Substrate for Bipolar Plates of PEM Fuel Cells. *Int. J. Hydrog. Energy* **2020**, *45*, 20679–20691, doi:10.1016/j.ijhydene.2019.12.157.
7. Alishahi, M.; Mahboubi, F.; Mousavi Khoie, S.M.; Aparicio, M.; Hübner, R.; Soldera, F.; Gago, R. Electrochemical Behavior of Nanocrystalline Ta/TaN Multilayer on 316L Stainless Steel: Novel Bipolar Plates for Proton Exchange Membrane Fuel-Cells. *J. Power Sources* **2016**, *322*, 1–9, doi:10.1016/j.jpowsour.2016.04.133.
8. Yan, P.; Ying, T.; Yang, Y.; Cao, F.; Li, Y.; Wang, J.; Zeng, X. Investigation of Anodized Ta/Ag Coating on Magnesium Bipolar Plate for Lightweight Proton Exchange Membrane Fuel Cells. *Corros. Sci.* **2022**, *197*, doi:10.1016/j.corsci.2022.110086.
9. Hu, B.; Chang, F.L.; Xiang, L.Y.; He, G.J.; Cao, X.W.; Yin, X.C. High Performance Polyvinylidene Fluoride/Graphite/Multi-Walled Carbon Nanotubes Composite Bipolar Plate for PEMFC with Segregated Conductive Networks. *Int. J. Hydrog. Energy* **2021**, *46*, 25666–25676, doi:10.1016/j.ijhydene.2021.05.081.
10. Dhakate, S.R.; Sharma, S.; Borah, M.; Mathur, R.B.; Dhimi, T.L. Expanded Graphite-Based Electrically Conductive Composites as Bipolar Plate for PEM Fuel Cell. *Int. J. Hydrog. Energy* **2008**, *33*, 7146–7152, doi:10.1016/j.ijhydene.2008.09.004.
11. U.S. Department of Energy 2017 3.4-18.; <https://www.energy.gov/eere/fuelcells/doe-technical-targets-polymer-electrolyte-membrane-fuel-cell-components> (accessed on 27 March 2022).
